# Supplementary material for: Cardiovascular therapy use, modification, and in-hospital death in patients with COVID-19: A cohort study
Source: PubMed Central journal article supplement (PMC9683559; doi:10.1371/journal.pone.0277653), 2022-11-23
Supplement: pone.0277653.s002.pdf [file pone.0277653.s002.pdf]

# Supporting information

**S1 Table.** Vital signs and laboratory values at hospital admission in patients with modified RASi exposure status with (discontinuation vs continuation) and without (absence vs initiation) prior exposure to this therapy.

| RASi                                        | Continuation vs discontinuation |                 |         |           | Initiation vs absence |              |         |           |
|---------------------------------------------|---------------------------------|-----------------|---------|-----------|-----------------------|--------------|---------|-----------|
|                                             | Continuation                    | Discontinuation | P value | Missings  | Absent                | Initiation   | P value | Missings  |
| N (%)                                       | 182 (67.9)                      | 86 (32.1)       |         |           | 542 (95.1)            | 28 (4.9)     |         |           |
| Vital signs on admission                    |                                 |                 |         |           |                       |              |         |           |
| SBP (mmHg)                                  | 131 (31)                        | 119 (31)        | <0.001  | 12 (4.48) | 121 (27)              | 137 (28)     | <0.001  | 26 (4.56) |
| DBP (mmHg)                                  | 72 (21)                         | 68 (20)         | 0.022   | 12 (4.48) | 72 (16)               | 73 (28)      | 0.712   | 26 (4.56) |
| Pulse (bpm)                                 | 76 (24)                         | 78 (19)         | 0.249   | 12 (4.48) | 78 (25)               | 70 (36)      | 0.356   | 26 (4.56) |
| Respiratory rate (cpm)                      | 22 (7)                          | 23 (8)          | 0.148   | 16 (5.97) | 21 (7)                | 21 (6)       | 0.521   | 42 (7.37) |
| Laboratory on admission                     |                                 |                 |         |           |                       |              |         |           |
| WBC (G/L)                                   | 6.1 (3.6)                       | 6.2 (4.0)       | 0.745   | 5 (1.87)  | 5.7 (3.5)             | 6.5 (4.0)    | 0.108   | 19 (3.33) |
| CRP (mg/L)                                  | 53.1 (76.1)                     | 76.2 (64.7)     | 0.002   | 10 (3.73) | 51.6 (74.3)           | 66.6 (124.6) | 0.323   | 24 (4.21) |
| eGFR (CKD-EPI) (mL/min/1.73m <sup>2</sup> ) | 61.9 (39.5)                     | 52.9 (37.2)     | 0.003   | 4 (1.49)  | 86.0 (34.6)           | 72.7 (52.4)  | 0.042   | 17 (2.98) |
| Creatinin (μmol/L),                         | 93.0 (46.5)                     | 108.0 (80.0)    | 0.002   | 4 (1.49)  | 75.5 (30.0)           | 87.0 (41.0)  | 0.068   | 17 (2.98) |
| Outcomes                                    |                                 |                 |         |           |                       |              |         |           |
| Cardiovascular events (overall)             | 52 (28.6)                       | 18 (20.9)       | 0.184   | 0 (0.00)  | 77 (14.2)             | 13 (46.4)    | <0.001  | 0 (0.00)  |
| Acute coronary syndrome                     | 7 (3.8)                         | 2 (2.3)         | 0.519   | 0 (0.00)  | 7 (1.3)               | 2 (7.1)      | 0.015   | 0 (0.00)  |
| Arrhythmia                                  | 16 (8.8)                        | 5 (5.8)         | 0.397   | 0 (0.00)  | 21 (3.9)              | 3 (10.7)     | 0.079   | 0 (0.00)  |
| Heart failure                               | 28 (15.4)                       | 11 (12.8)       | 0.574   | 0 (0.00)  | 42 (7.7)              | 8 (28.6)     | <0.001  | 0 (0.00)  |
| Stroke                                      | 5 (2.7)                         | 1 (1.2)         | 0.413   | 0 (0.00)  | 4 (0.7)               | 0 (0.0)      | 0.648   | 0 (0.00)  |
| Acute venous thromboembolism                | 4 (2.2)                         | 4 (4.7)         | 0.271   | 0 (0.00)  | 17 (3.1)              | 2 (7.1)      | 0.249   | 0 (0.00)  |

Data are expressed as median with interquartile range for continuous variables and count with relative percentage for missing values. P-values were obtained using the Wilcoxon-Mann-Whitney test. SBP: systolic blood pressure; DBP: diastolic blood pressure; WBC: white blood cells; CRP: C reactive protein; eGFR estimated glomerular filtration rate.
