# Supplementary material for: Cardiovascular therapy use, modification, and in-hospital death in patients with COVID-19: A cohort study
Source: PubMed Central journal article supplement (PMC9683559; doi:10.1371/journal.pone.0277653), 2022-11-23
Supplement: pone.0277653.s004.pdf [file pone.0277653.s004.pdf]

# Supporting information

**S3 Table.** Vital signs and laboratory values at hospital admission in patients with modified calcium channel blocking therapy exposure status with (discontinuation vs continuation) and without (absence vs initiation) prior exposure to this therapy.

| Calcium channel blockers          | Continuation vs discontinuation |                 |         |           | Initiation vs absence |             |         |           |
|-----------------------------------|---------------------------------|-----------------|---------|-----------|-----------------------|-------------|---------|-----------|
|                                   | Continuation                    | Discontinuation | P value | Missings  | Absent                | Initiation  | P value | Missings  |
| N (%)                             | 93 (75.6)                       | 30 (24.4)       |         |           | 631 (88.3)            | 84 (11.7)   |         |           |
| Vital signs on admission          |                                 |                 |         |           |                       |             |         |           |
| SBP (mmHg)                        | 133 (38)                        | 127 (45)        | 0.170   | 7 (5.69)  | 122 (26)              | 126 (31)    | 0.004   | 31 (4.34) |
| DBP (mmHg)                        | 70 (25)                         | 70 (20)         | 0.747   | 7 (5.69)  | 72 (16)               | 74 (21)     | 0.361   | 31 (4.34) |
| Pulse (bpm)                       | 78 (26)                         | 76 (21)         | 0.633   | 7 (5.69)  | 78 (24)               | 78 (28)     | 0.818   | 31 (4.34) |
| Respiratory rate (cpm)            | 22 (9)                          | 22 (8)          | 0.681   | 10 (8.13) | 22 (8)                | 21 (8)      | 0.440   | 48 (6.71) |
| Laboratory on admission           |                                 |                 |         |           |                       |             |         |           |
| WBC (G/L)                         | 6.3 (4.1)                       | 6.7 (4.5)       | 0.871   | 4 (3.25)  | 5.8 (3.6)             | 6.2 (3.5)   | 0.113   | 20 (2.80) |
| CRP (mg/L)                        | 54.5 (71.8)                     | 55.1 (106.6)    | 0.665   | 4 (3.25)  | 50.5 (74.3)           | 76.5 (96.6) | 0.001   | 30 (4.20) |
| eGFR (mL/min/1.73m <sup>2</sup> ) | 58.1 (49.7)                     | 47.4 (41.4)     | 0.055   | 2 (1.63)  | 82.5 (38.7)           | 76.7 (32.1) | 0.058   | 19 (2.66) |
| Creatinin (μmol/L),               | 97.0 (79.0)                     | 109.5 (123.8)   | 0.071   | 2 (1.63)  | 77.0 (36.0)           | 79.0 (40.5) | 0.294   | 19 (2.66) |
| Outcomes                          |                                 |                 |         |           |                       |             |         |           |
| Cardiovascular events (overall)   | 25 (26.9)                       | 10 (33.3)       | 0.496   | 0 (0.00)  | 105 (16.6)            | 20 (23.8)   | 0.104   | 0 (0.00)  |
| Acute coronary syndrome           | 2 (2.2)                         | 0 (0.0)         | 0.418   | 0 (0.00)  | 13 (2.1)              | 3 (3.6)     | 0.379   | 0 (0.00)  |
| Arrhythmia                        | 5 (5.4)                         | 3 (10.0)        | 0.372   | 0 (0.00)  | 31 (4.9)              | 6 (7.1)     | 0.386   | 0 (0.00)  |
| Heart failure                     | 11 (11.8)                       | 7 (23.3)        | 0.121   | 0 (0.00)  | 63 (10.0)             | 8 (9.5)     | 0.895   | 0 (0.00)  |
| Stroke                            | 2 (2.2)                         | 1 (3.3)         | 0.715   | 0 (0.00)  | 4 (0.6)               | 3 (3.6)     | 0.010   | 0 (0.00)  |
| Acute venous thromboembolism      | 5 (5.4)                         | 1 (3.3)         | 0.651   | 0 (0.00)  | 14 (2.2)              | 7 (8.3)     | 0.002   | 0 (0.00)  |

Data are expressed as median with interquartile range for continuous variables and count with relative percentage for missing values. P-values were obtained using the Wilcoxon-Mann-Whitney test. SBP: systolic blood pressure; DBP: diastolic blood pressure; WBC: white blood cells; CRP: C reactive protein; eGFR estimated glomerular filtration rate.
