# Supplementary material for: Cardiovascular therapy use, modification, and in-hospital death in patients with COVID-19: A cohort study
Source: PubMed Central journal article supplement (PMC9683559; doi:10.1371/journal.pone.0277653), 2022-11-23
Supplement: pone.0277653.s005.pdf [file pone.0277653.s005.pdf]

# Supporting information

**S4 Table.** Vital signs and laboratory values at hospital admission in patients with modified diuretics exposure status with (discontinuation vs continuation) and without (absence vs initiation) prior exposure to this therapy.

| Diuretics                         | Continuation vs discontinuation |                 |         |           | Initiation vs absence |              |         |           |
|-----------------------------------|---------------------------------|-----------------|---------|-----------|-----------------------|--------------|---------|-----------|
|                                   | Continuation                    | Discontinuation | P value | Missings  | Absent                | Initiation   | P value | Missings  |
| N (%)                             | 153 (76.5)                      | 47 (23.5)       |         |           | 486 (76.2)            | 152 (23.8)   |         |           |
| Vital signs on admission          |                                 |                 |         |           |                       |              |         |           |
| SBP (mmHg)                        | 126 (34)                        | 119 (32)        | 0.120   | 11 (5.50) | 123 (27)              | 124 (28)     | 0.778   | 27 (4.23) |
| DBP (mmHg)                        | 68 (23)                         | 70 (18)         | 0.419   | 11 (5.50) | 74 (17)               | 70 (16)      | 0.001   | 27 (4.23) |
| Pulse (bpm)                       | 75 (25)                         | 78 (19)         | 0.099   | 11 (5.50) | 78 (23)               | 79 (26)      | 0.839   | 27 (4.23) |
| Respiratory rate (cpm)            | 22 (9)                          | 21 (6)          | 0.251   | 18 (9.00) | 21 (7)                | 22 (8)       | 0.106   | 40 (6.27) |
| Laboratory on admission           |                                 |                 |         |           |                       |              |         |           |
| WBC (G/L)                         | 6.1 (4.4)                       | 6.6 (3.8)       | 0.211   | 6 (3.00)  | 5.6 (3.2)             | 6.7 (4.2)    | <0.001  | 18 (2.82) |
| CRP (mg/L)                        | 48.0 (63.5)                     | 81.3 (94.5)     | 0.024   | 7 (3.50)  | 48.2 (71.9)           | 81.7 (102.6) | <0.001  | 27 (4.23) |
| eGFR (mL/min/1.73m <sup>2</sup> ) | 47.8 (42.0)                     | 50.4 (31.3)     | 0.597   | 4 (2.00)  | 88.2 (31.1)           | 69.8 (35.5)  | <0.001  | 17 (2.66) |
| Creatinin (μmol/L),               | 105.0 (81.0)                    | 111.0 (67.5)    | 0.376   | 4 (2.00)  | 74.0 (30.0)           | 83.0 (40.0)  | <0.001  | 17 (2.66) |
| Outcomes                          |                                 |                 |         |           |                       |              |         |           |
| Cardiovascular events (overall)   | 64 (41.8)                       | 10 (21.3)       | 0.011   | 0 (0.00)  | 32 (6.6)              | 54 (35.5)    | <0.001  | 0 (0.00)  |
| Acute coronary syndrome           | 6 (3.9)                         | 1 (2.1)         | 0.558   | 0 (0.00)  | 4 (0.8)               | 7 (4.6)      | 0.002   | 0 (0.00)  |
| Arrhythmia                        | 13 (8.5)                        | 3 (6.4)         | 0.640   | 0 (0.00)  | 13 (2.7)              | 16 (10.5)    | <0.001  | 0 (0.00)  |
| Heart failure                     | 44 (28.8)                       | 4 (8.5)         | 0.004   | 0 (0.00)  | 11 (2.3)              | 30 (19.7)    | <0.001  | 0 (0.00)  |
| Stroke                            | 2 (1.3)                         | 2 (4.3)         | 0.207   | 0 (0.00)  | 4 (0.8)               | 2 (1.3)      | 0.583   | 0 (0.00)  |
| Acute venous thromboembolism      | 7 (4.6)                         | 1 (2.1)         | 0.454   | 0 (0.00)  | 5 (1.0)               | 14 (9.2)     | <0.001  | 0 (0.00)  |

Data are expressed as median with interquartile range for continuous variables and count with relative percentage for missing values. P-values were obtained using the Wilcoxon-Mann-Whitney test. SBP: systolic blood pressure; DBP: diastolic blood pressure; WBC: white blood cells; CRP: C reactive protein; eGFR estimated glomerular filtration rate.
