# Supplementary material for: Cardiovascular therapy use, modification, and in-hospital death in patients with COVID-19: A cohort study
Source: PubMed Central journal article supplement (PMC9683559; doi:10.1371/journal.pone.0277653), 2022-11-23
Supplement: pone.0277653.s007.pdf [file pone.0277653.s007.pdf]

# Supporting information

**S6 Table.** Vital signs and laboratory values at hospital admission in patients with modified antiplatelet therapy exposure status with (discontinuation vs continuation) and without (absence vs initiation) prior exposure to this therapy.

| Antiplatelets                     | Continuation vs discontinuation |                 |         |           | Initiation vs absence |              |         |           |
|-----------------------------------|---------------------------------|-----------------|---------|-----------|-----------------------|--------------|---------|-----------|
|                                   | Continuation                    | Discontinuation | P value | Missings  | Absent                | Initiation   | P value | Missings  |
| N (%)                             | 154 (85.6)                      | 26 (14.4)       |         |           | 631 (95.9)            | 27 (4.1)     |         |           |
| Vital signs on admission          |                                 |                 |         |           |                       |              |         |           |
| SBP (mmHg)                        | 128 (36)                        | 136 (44)        | 0.234   | 11 (6.11) | 122 (26)              | 125 (52)     | 0.797   | 27 (4.10) |
| DBP (mmHg)                        | 69 (17)                         | 72 (24)         | 0.181   | 11 (6.11) | 73 (16)               | 72 (26)      | 0.524   | 27 (4.10) |
| Pulse (bpm)                       | 76 (24)                         | 66 (80)         | 0.135   | 11 (6.11) | 78 (24)               | 73 (88)      | 0.206   | 27 (4.10) |
| Respiratory rate (cpm)            | 21 (6)                          | 22 (10)         | 0.526   | 14 (7.78) | 22 (8)                | 23 (7)       | 0.236   | 44 (6.69) |
| Laboratory on admission           |                                 |                 |         |           |                       |              |         |           |
| WBC (G/L)                         | 5.8 (4.3)                       | 7.0 (4.0)       | 0.281   | 6 (3.33)  | 5.8 (3.5)             | 6.9 (3.8)    | 0.229   | 18 (2.74) |
| CRP (mg/L)                        | 40.6 (71.6)                     | 50.9 (63.1)     | 0.411   | 6 (3.33)  | 56.6 (75.2)           | 78.0 (101.6) | 0.053   | 28 (4.26) |
| eGFR (mL/min/1.73m <sup>2</sup> ) | 53.8 (43.0)                     | 80.3 (34.1)     | 0.001   | 4 (2.22)  | 83.5 (36.9)           | 64.9 (53.0)  | 0.032   | 17 (2.58) |
| Creatinin (μmol/L)                | 103.0 (78.8)                    | 72.0 (34.0)     | 0.002   | 4 (2.22)  | 77.0 (35.0)           | 91.0 (52.2)  | 0.024   | 17 (2.58) |
| Outcomes                          |                                 |                 |         |           |                       |              |         |           |
| Cardiovascular events (overall)   | 44 (28.6)                       | 9 (34.6)        | 0.532   | 0 (0.00)  | 95 (15.1)             | 12 (44.4)    | <0.001  | 0 (0.00)  |
| Acute coronary syndrome           | 8 (5.2)                         | 2 (7.7)         | 0.607   | 0 (0.00)  | 2 (0.3)               | 6 (22.2)     | <0.001  | 0 (0.00)  |
| Arrhythmia                        | 9 (5.8)                         | 2 (7.7)         | 0.716   | 0 (0.00)  | 31 (4.9)              | 3 (11.1)     | 0.154   | 0 (0.00)  |
| Heart failure                     | 26 (16.9)                       | 6 (23.1)        | 0.445   | 0 (0.00)  | 52 (8.2)              | 5 (18.5)     | 0.063   | 0 (0.00)  |
| Stroke                            | 4 (2.6)                         | 1 (3.8)         | 0.720   | 0 (0.00)  | 4 (0.6)               | 1 (3.7)      | 0.072   | 0 (0.00)  |
| Acute venous thromboembolism      | 4 (2.6)                         | 2 (7.7)         | 0.181   | 0 (0.00)  | 20 (3.2)              | 1 (3.7)      | 0.877   | 0 (0.00)  |

Data are expressed as median with interquartile range for continuous variables and count with relative percentage for missing values. P-values were obtained using the Wilcoxon-Mann-Whitney test. SBP: systolic blood pressure; DBP: diastolic blood pressure; WBC: white blood cells; CRP: C reactive protein; eGFR estimated glomerular filtration rate.
