# Supplementary material for: Cardiovascular therapy use, modification, and in-hospital death in patients with COVID-19: A cohort study
Source: PubMed Central journal article supplement (PMC9683559; doi:10.1371/journal.pone.0277653), 2022-11-23
Supplement: pone.0277653.s008.pdf [file pone.0277653.s008.pdf]

# Supporting information

**S7 Table.** Vital signs and laboratory values at hospital admission in patients with modified anticoagulation exposure status with (discontinuation vs continuation) and without (absence vs initiation) prior exposure to this therapy.

| Anticoagulants                    | Continuation vs discontinuation |                 |         |            | Initiation vs absence |             |         |           |
|-----------------------------------|---------------------------------|-----------------|---------|------------|-----------------------|-------------|---------|-----------|
|                                   | Continuation                    | Discontinuation | P value | Missings   | Absent                | Initiation  | P value | Missings  |
| N (%)                             | 120 (90.2)                      | 13 (9.8)        |         |            | 99 (14.0)             | 606 (86.0)  |         |           |
| Vital signs on admission          |                                 |                 |         |            |                       |             |         |           |
| SBP (mmHg)                        | 130 (33)                        | 137 (42)        | 0.444   | 7 (5.26)   | 120 (27)              | 123 (28)    | 0.229   | 31 (4.40) |
| DBP (mmHg)                        | 68 (20)                         | 63 (24)         | 0.857   | 7 (5.26)   | 73 (18)               | 72 (16)     | 0.877   | 31 (4.40) |
| Pulse (bpm)                       | 78 (28)                         | 88 (10)         | 0.031   | 7 (5.26)   | 74 (28)               | 78 (23)     | 0.137   | 31 (4.40) |
| Respiratory rate (cpm)            | 21 (8)                          | 22 (12)         | 0.685   | 14 (10.53) | 22 (6)                | 22 (8)      | 0.933   | 44 (6.24) |
| Laboratory on admission           |                                 |                 |         |            |                       |             |         |           |
| WBC (G/L)                         | 5.9 (4.9)                       | 7.0 (5.2)       | 0.761   | 5 (3.76)   | 6.0 (4.7)             | 5.8 (3.4)   | 1.000   | 19 (2.70) |
| CRP (mg/L)                        | 49.8 (77.9)                     | 56.6 (81.0)     | 0.803   | 11 (8.27)  | 49.8 (70.3)           | 55.1 (78.0) | 0.180   | 23 (3.26) |
| eGFR (mL/min/1.73m <sup>2</sup> ) | 63.2 (46.5)                     | 58.2 (40.1)     | 0.425   | 4 (3.01)   | 83.7 (39.1)           | 80.3 (39.0) | 0.255   | 17 (2.41) |
| Creatinin (μmol/L),               | 92.5 (70.8)                     | 101.0 (103.5)   | 0.436   | 4 (3.01)   | 75.5 (35.2)           | 79.5 (36.2) | 0.293   | 17 (2.41) |
| Outcomes                          |                                 |                 |         |            |                       |             |         |           |
| Cardiovascular events (overall)   | 47 (39.2)                       | 7 (53.8)        | 0.306   | 0 (0.00)   | 8 (8.1)               | 98 (16.2)   | 0.037   | 0 (0.00)  |
| Acute coronary syndrome           | 3 (2.5)                         | 1 (7.7)         | 0.298   | 0 (0.00)   | 3 (3.0)               | 11 (1.8)    | 0.422   | 0 (0.00)  |
| Arrhythmia                        | 7 (5.8)                         | 3 (23.1)        | 0.025   | 0 (0.00)   | 1 (1.0)               | 34 (5.6)    | 0.051   | 0 (0.00)  |
| Heart failure                     | 33 (27.5)                       | 4 (30.8)        | 0.803   | 0 (0.00)   | 6 (6.1)               | 46 (7.6)    | 0.589   | 0 (0.00)  |
| Stroke                            | 5 (4.2)                         | 0 (0.0)         | 0.453   | 0 (0.00)   | 0 (0.0)               | 5 (0.8)     | 0.364   | 0 (0.00)  |
| Acute venous thromboembolism      | 4 (3.3)                         | 0 (0.0)         | 0.504   | 0 (0.00)   | 1 (1.0)               | 22 (3.6)    | 0.174   | 0 (0.00)  |

Data are expressed as median with interquartile range for continuous variables and count with relative percentage for missing values. P-values were obtained using the Wilcoxon-Mann-Whitney test. SBP: systolic blood pressure; DBP: diastolic blood pressure; WBC: white blood cells; CRP: C reactive protein; eGFR estimated glomerular filtration rate.
