# Supplementary material for: Cardiovascular therapy use, modification, and in-hospital death in patients with COVID-19: A cohort study
Source: PubMed Central journal article supplement (PMC9683559; doi:10.1371/journal.pone.0277653), 2022-11-23
Supplement: pone.0277653.s009.pdf [file pone.0277653.s009.pdf]

# Supporting information

**S8 Table.** Vital signs and laboratory values at hospital admission in patients with modified antiarrhythmics exposure status with (discontinuation vs continuation) and without (absence vs initiation) prior exposure to this therapy.

| Antiarrhythmics                   | Continuation vs discontinuation |                 |         |           | Initiation vs absence |               |         |           |
|-----------------------------------|---------------------------------|-----------------|---------|-----------|-----------------------|---------------|---------|-----------|
|                                   | Continuation                    | Discontinuation | P value | Missings  | Absent                | Initiation    | P value | Missings  |
| N (%)                             | 13 (81.2)                       | 3 (18.8)        |         |           | 805 (97.9)            | 17 (2.1)      |         |           |
| Vital signs on admission          |                                 |                 |         |           |                       |               |         |           |
| SBP (mmHg)                        | 133 (48)                        | 134 (65)        | 0.427   | 1 (6.25)  | 124 (28)              | 122 (28)      | 0.315   | 37 (4.50) |
| DBP (mmHg)                        | 58 (22)                         | 83 (21)         | 0.083   | 1 (6.25)  | 72 (17)               | 65 (17)       | 0.035   | 37 (4.50) |
| Pulse (bpm)                       | 70 (16)                         | 79 (20)         | 0.420   | 1 (6.25)  | 78 (25)               | 76 (23)       | 0.301   | 37 (4.50) |
| Respiratory rate (cpm)            | 19 (6)                          | 20 (5)          | 0.665   | 1 (6.25)  | 22 (8)                | 22 (8)        | 0.579   | 57 (6.93) |
| Laboratory on admission           |                                 |                 |         |           |                       |               |         |           |
| WBC (G/L)                         | 4.9 (4.6)                       | 7.1 (4.8)       | 0.243   | 2 (12.50) | 5.9 (3.5)             | 8.9 (5.2)     | 0.007   | 22 (2.68) |
| CRP (mg/L)                        | 48.5 (58.9)                     | 87.0 (44.5)     | 0.076   | 3 (18.75) | 53.0 (75.2)           | 117.1 (126.2) | 0.001   | 31 (3.77) |
| eGFR (mL/min/1.73m <sup>2</sup> ) | 44.6 (39.9)                     | 71.9 (60.9)     | 0.122   | 0 (0.00)  | 79.0 (39.7)           | 70.7 (29.3)   | 0.256   | 21 (2.55) |
| Creatinin (μmol/L),               | 128.0 (80.0)                    | 91.0 (45.0)     | 0.093   | 0 (0.00)  | 79.0 (40.0)           | 97.0 (32.5)   | 0.208   | 21 (2.55) |
| Outcomes                          |                                 |                 |         |           |                       |               |         |           |
| Cardiovascular events (overall)   | 5 (38.5)                        | 1 (33.3)        | 0.869   | 0 (0.00)  | 141 (17.5)            | 13 (76.5)     | <0.001  | 0 (0.00)  |
| Acute coronary syndrome           | 1 (7.7)                         | 0 (0.0)         | 0.620   | 0 (0.00)  | 15 (1.9)              | 2 (11.8)      | 0.005   | 0 (0.00)  |
| Arrhythmia                        | 2 (15.4)                        | 0 (0.0)         | 0.468   | 0 (0.00)  | 35 (4.3)              | 8 (47.1)      | <0.001  | 0 (0.00)  |
| Heart failure                     | 3 (23.1)                        | 1 (33.3)        | 0.712   | 0 (0.00)  | 80 (9.9)              | 5 (29.4)      | 0.009   | 0 (0.00)  |
| Stroke                            | 1 (7.7)                         | 0 (0.0)         | 0.620   | 0 (0.00)  | 8 (1.0)               | 1 (5.9)       | 0.055   | 0 (0.00)  |
| Acute venous thromboembolism      | 0 (0.0)                         | 0 (0.0)         | .       | 0 (0.00)  | 23 (2.9)              | 4 (23.5)      | <0.001  | 0 (0.00)  |

Data are expressed as median with interquartile range for continuous variables and count with relative percentage for missing values. P-values were obtained using the Wilcoxon-Mann-Whitney test. SBP: systolic blood pressure; DBP: diastolic blood pressure; WBC: white blood cells; CRP: C reactive protein; eGFR estimated glomerular filtration rate.
